# Supplementary material
Source: PubMed Central journal article supplement (PMC6774854)
Supplement: NIHMS1532330-supplement-3.pdf [file NIHMS1532330-supplement-3.pdf]

Liver resection for CLM  
from January 2007 through March 2017  
N = 1460

No genetic sequencing data available: 803  
2007–2011: 610 of 735 (83.0%)  
2012–March 2017: 193 of 725 (26.6%)

Second or more hepatectomy: 78

2-stage hepatectomy failure: 16

First stage of successful 2-stage hepatectomy: 50\*

R2 resection or residual liver lesion: 6

N = 507
